# Supplementary material
Source: PubMed Central journal article supplement (PMC7101142)
Supplement: jciinsight-5-131494-s130.pdf [file jciinsight-5-131494-s130.pdf]

1 **Supplementary material:**

2

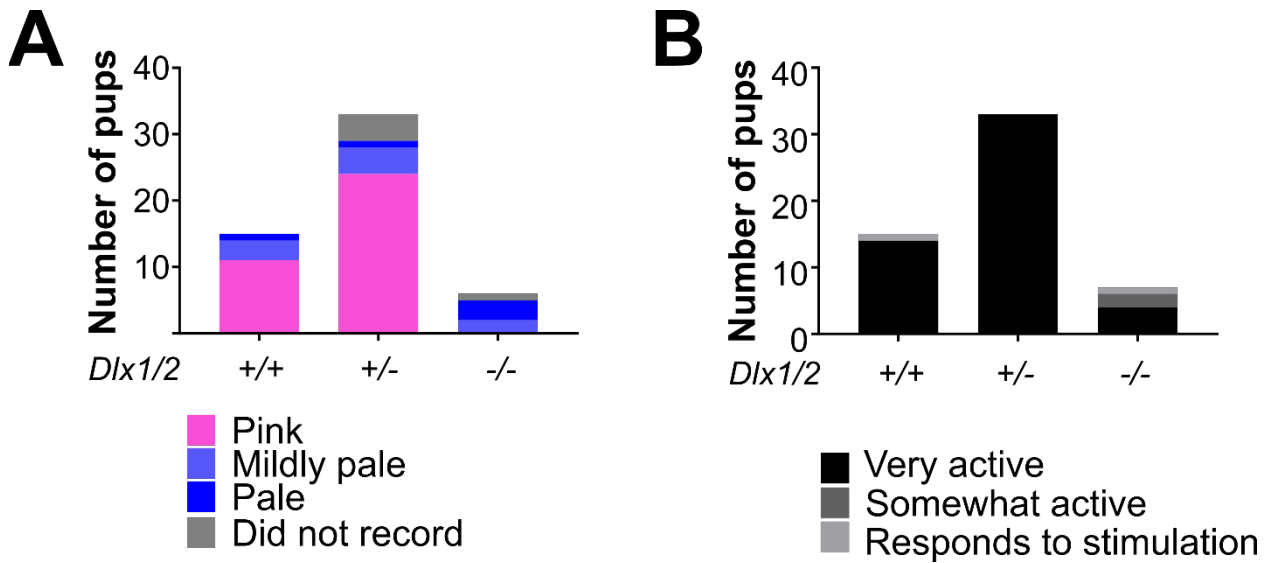

5 **Supplementary Figure 1:**

6 (A-B) A higher proportion of *Dlx1/2*<sup>-/-</sup> mice given FITC dextran were pale-appearing (A)  
7 and exhibited fewer spontaneous movements (B) compared to wild-type and  
8 heterozygous controls.

9

10

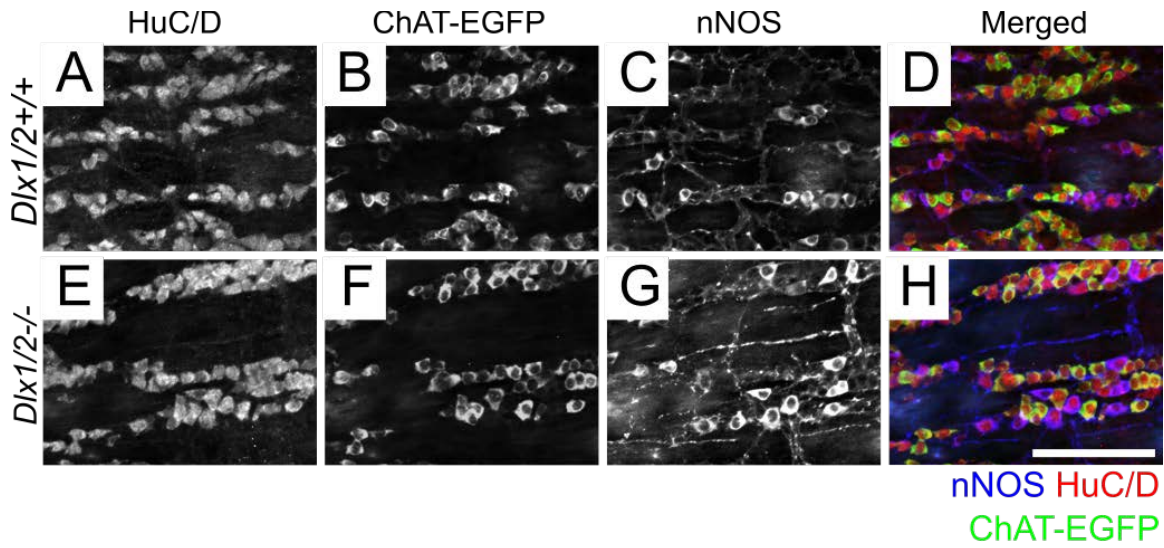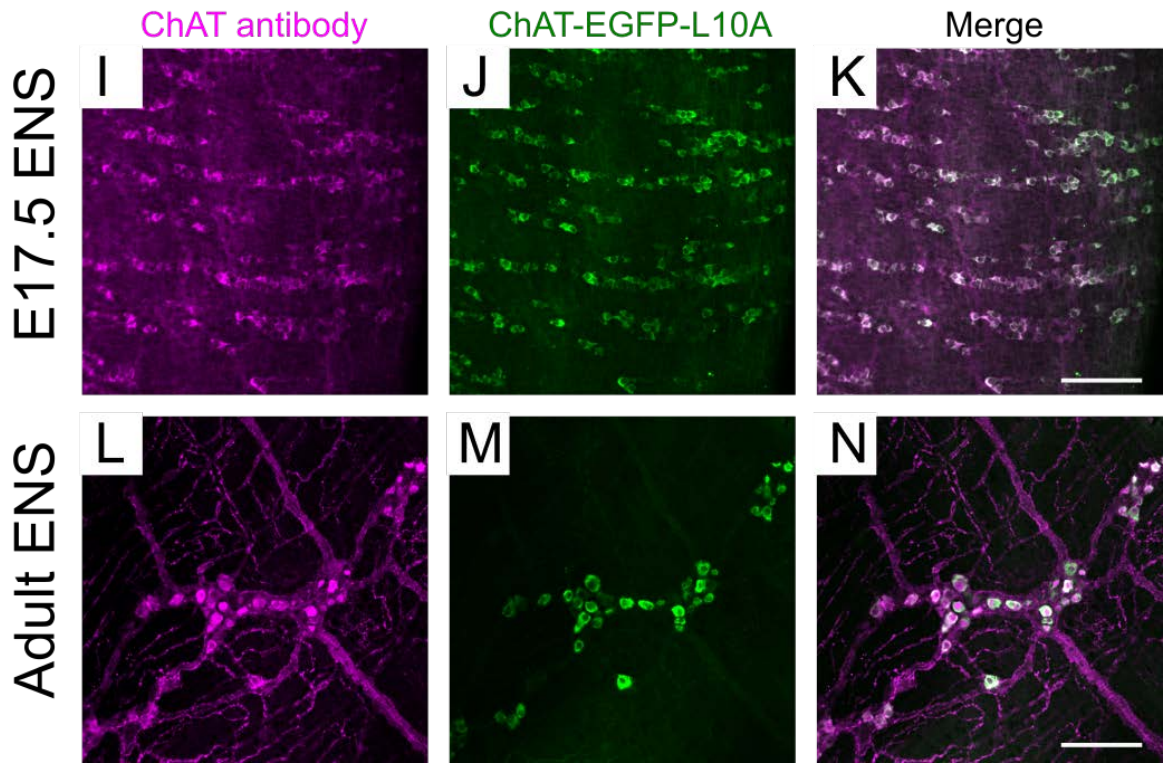

11

12

13 **Supplementary Figure 2:**

14 (A-H) Colorblind-friendly separation of channels for *Dlx1/2*; *ChAT-EGFP* images shown

15 in Figure 6A (A-D) and Figure 6G (E-H). (I-N) Immunostaining small intestine with a

16 ChAT antibody confirms colocalization with EGFP at E17.5 (I-K) and in adulthood (L-  
17 N).

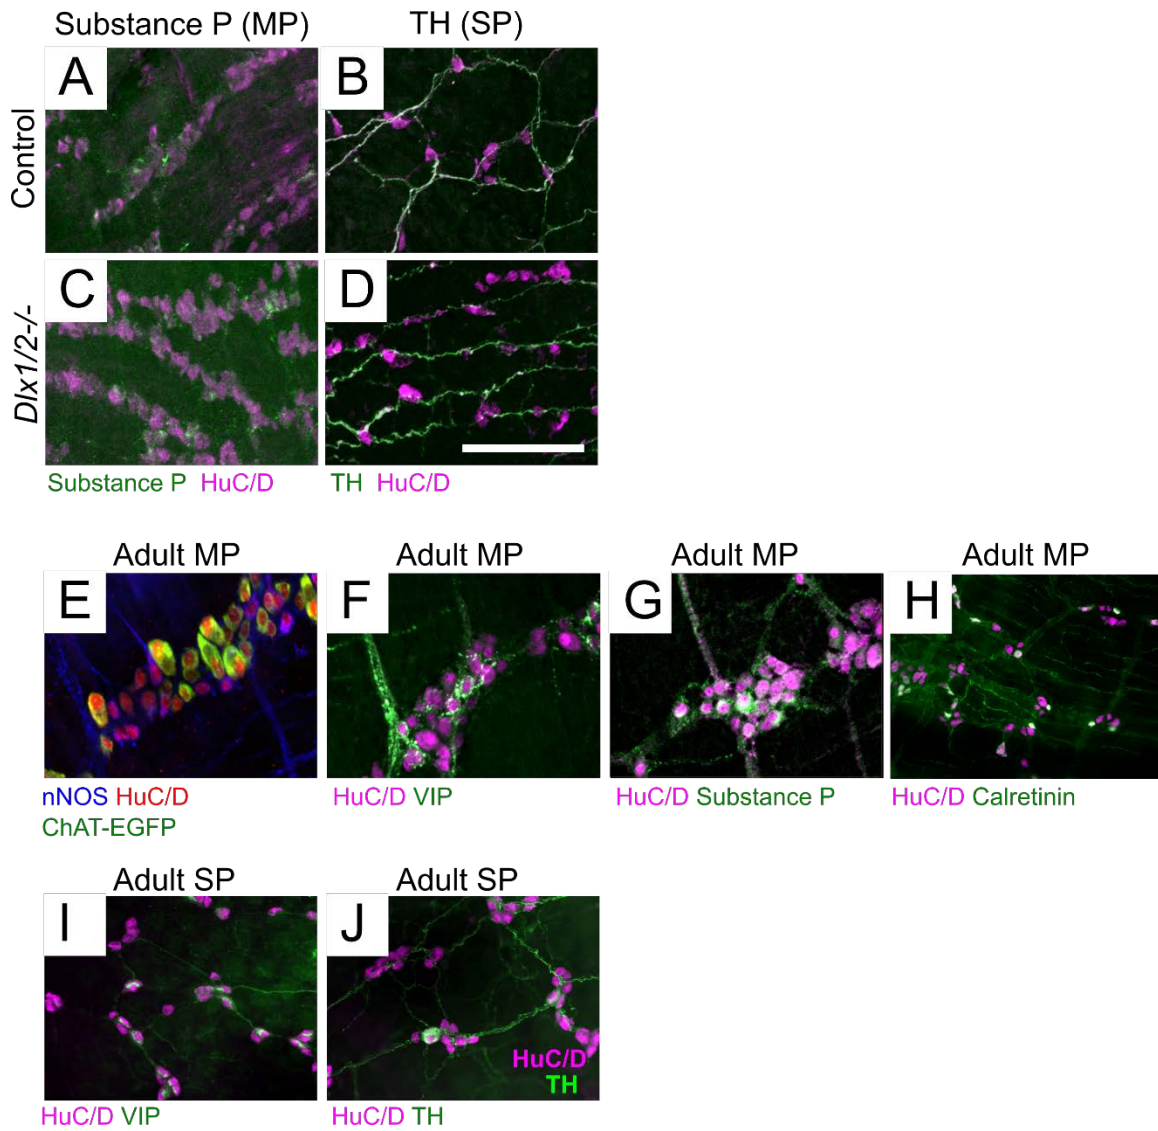

18

19

20 **Supplementary Figure 3:**

21 (A-D) Myenteric plexus (MP) substance P (A,C) and submucosal plexus (SP) tyrosine  
 22 hydroxylase (TH; B,D) appeared normal in *Dlx1/2-/-* P0 small intestine, but we did not  
 23 perform quantifications. (E-J) Positive control immunostaining in adult mouse small  
 24 intestine for antibodies used in Figure 6. Scale bar = 100 μm.

25

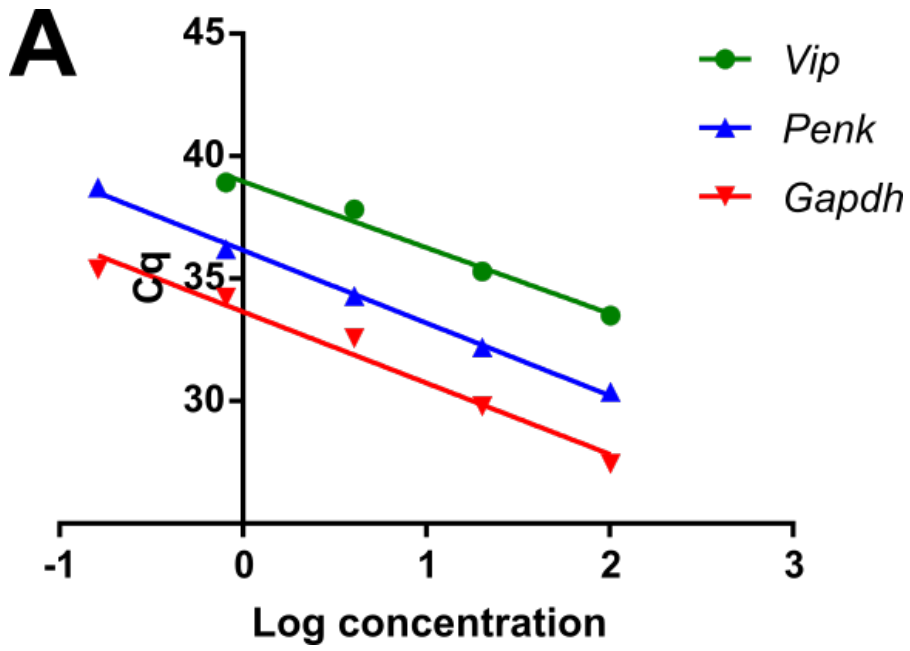

26  
27

28 **Supplementary Figure 4:**

29 (A) qPCR standard curve for validation of *Vip*, *Penk*, and *Gapdh*.

30

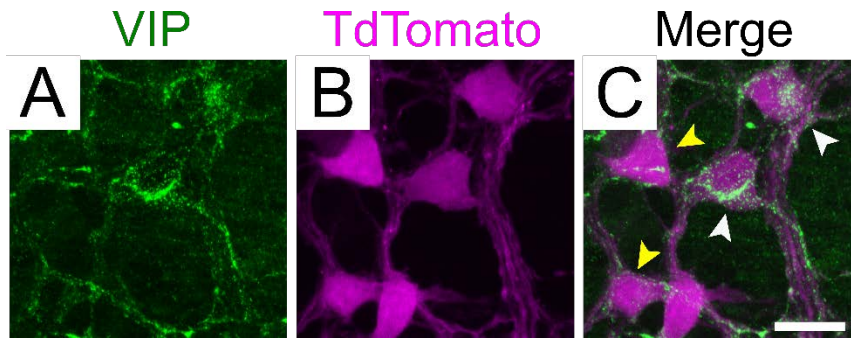

31

32 **Supplementary Figure 5:**

33 (A-C) VIP (green, A) and TdTomato (magenta, B) co-localization in a *Dlx1/2; Vip-Ires-*

34 *Cre; TdTomato* control P0 mouse. White arrowheads indicate high VIP expressing cells;

35 yellow arrowheads indicate low VIP expressors. Scale bar is 20 microns.

36

37

38

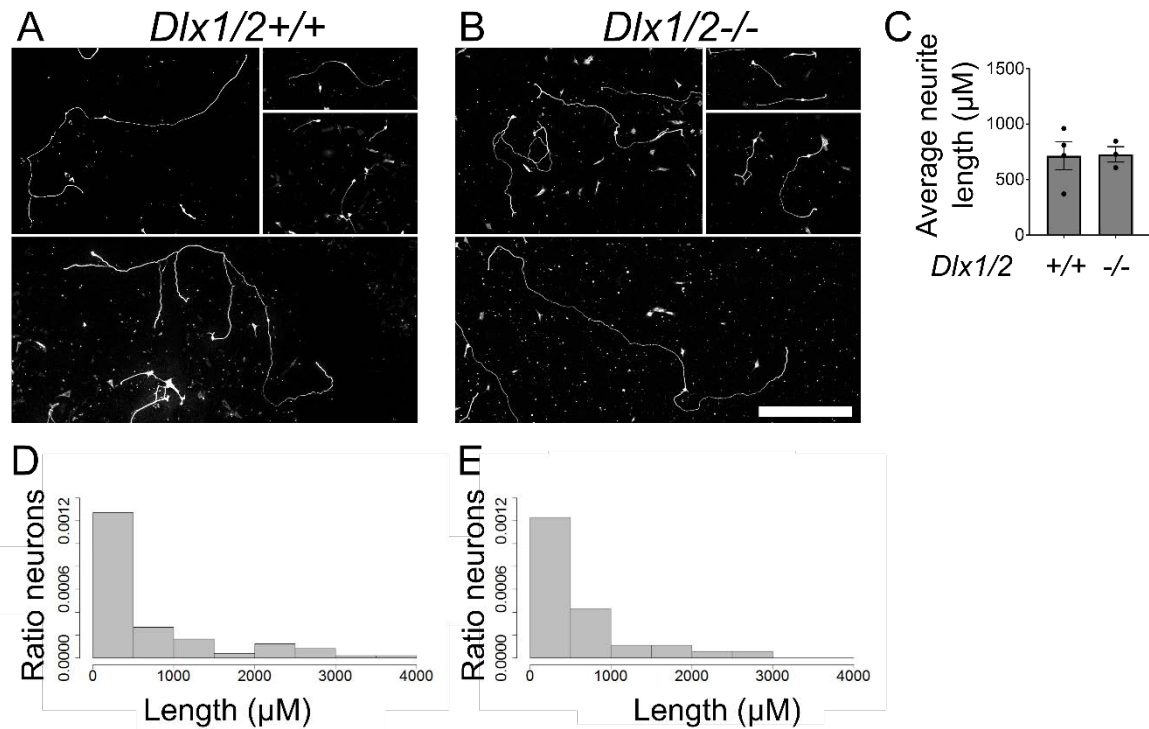

40

41

**Supplementary Figure 6: Cultured *Dlx1/2-/-* enteric neurons show no neurite length**

42

**differences in vitro.** (A-B) Representative images of cultured WT (A) and *Dlx1/2-/-* (B)

43

neurons stained with TuJ1 antibody. (C) Quantification of total neurite length/total

44

neuron number (Student's t-test,  $N > 400$  nerve cell bodies,  $n = 4$  embryos (+/+) and  $n=3$

45

embryos (-/-)). (D-E) Histograms of total neurite length in single cells where neurites

46

could be traced unambiguously ( $N = 96$  (*Dlx1/2+/+*),  $N = 70$  (*Dlx1/2-/-*)). Scale bar =

47

500  $\mu\text{m}$  and applies to all images shown.

48

49

50 **Supplementary Table 1: Genotyping primers**

| <b><u>Primer name</u></b>                       | <b><u>Sequence</u></b>                             | <b><u>Genotyping solution</u></b> |
|-------------------------------------------------|----------------------------------------------------|-----------------------------------|
| <i>Dlx1/2</i> and<br><i>Dlx2</i> mutant F       | 5' CTA CTC CGC CAA AAG CAG CTA CGA CC<br>3'        | KAPA (Roche)                      |
| <i>Dlx1/2</i> and<br><i>Dlx2</i> mutant R       | 5' GCC AGC TCA TTC CTC CCA CTC ATG ATC<br>3'       | KAPA                              |
| <i>Dlx1/2</i> and<br><i>Dlx2</i> wild type<br>F | 5' GCT GAT GGA TGA GCT CTA AGT ATG 3'              | KAPA                              |
| <i>Dlx1/2</i> and<br><i>Dlx2</i> wild type<br>R | 5' ACG CAC CAT CTA CTC CAG TTT 3'                  | KAPA                              |
| <i>Dlx1</i> wild type<br>F                      | 5' AAC CCC TGT TCC GCT TAA ATT GGG TTC<br>CTT C 3' | KAPA                              |
| <i>Dlx1</i> wild type<br>R                      | 5' GTG GCT GCT GAC CGA GTT GAC GTA GG<br>3'        | KAPA                              |
| <i>Cre</i> wild type F                          | 5' GCA TTA CCG GTC GAT GCA ACG AGT<br>GAT GAG 3'   | KAPA                              |
| <i>Cre</i> wild type R                          | 5' GAG TGA ACG AAC CTG GTC GAA ATC<br>AGT GCG 3'   | KAPA                              |
| <i>GFP</i> transgene<br>F                       | 5' GCA CGA CTT CTT CAA GTC CGC CAT GCC<br>3'       | KAPA                              |



|                             |                                                  |                                                  |
|-----------------------------|--------------------------------------------------|--------------------------------------------------|
| <i>GFP</i> transgene<br>R   | 5' GCG GAT CTT GAA GTT CAC CTT GAT GCC<br>3'     | KAPA                                             |
| <i>Tdtomato</i><br>mutant F | 5' ACT ACT ACG TGG ACA CCA AGC TGG<br>ACA TCA 3' | KAPA                                             |
| <i>Tdtomato</i><br>mutant R | 5' GGC ATT AAA GCA GCG TAT CCA CAT<br>AGC GTA 3' | KAPA                                             |
| <i>Tdtomato</i> WT F        | 5' GTT ATC AGT AAG GGA GCT GCA GTG<br>GAG TAG 3' | GoTaq Green Master Mix<br>(Promega, Madison, WI) |
| <i>Tdtomato</i> WT<br>R     | 5' CCG AAA ATC TGT GGG AAG TCT TGT<br>CCC TCC 3' | GoTaq Green Master Mix                           |

51  
52

53 **Supplementary Table 2: List of antibodies**

| <b>Antibody</b>                           | <b>Concentration</b> | <b>Catalog number</b> | <b>Source</b>                                         |
|-------------------------------------------|----------------------|-----------------------|-------------------------------------------------------|
| Rabbit anti-TuJ1                          | 1:10,000             | PRB-435P              | Covance (Princeton, NJ);<br>RRID:AB_10063850          |
| Rabbit anti-nNOS                          | 1:200                | AB5380                | Chemicon/Millipore (Burlington, MA);<br>RRID:AB_91824 |
| Rabbit anti-GABA                          | 1:200                | A2052                 | Sigma;<br>RRID:AB_477652                              |
| Rat anti-Somatostatin                     | 1:500                | MAB354                | Millipore;<br>RRID:AB_2255365                         |
| Rabbit anti-Calretinin                    | 1:5000               | AB5054                | Chemicon;<br>RRID:AB_2068506                          |
| Rabbit anti-vasoactive intestinal peptide | 1:300                | 20077                 | Immunostar (Hudson, WI); RRID:AB_572270               |
| Sheep anti-tyrosine hydroxylase           | 1:500                | AB152                 | Chemicon                                              |
| ANNA-1 (HuC/D)                            | N/A*                 | N/A                   | Kind gift from Dr. V. Lennon, Mayo Clinic             |
| Rabbit anti-S100 $\beta$                  | 1:200                | Ab52642               | Abcam;<br>RRID:AB_882426                              |

|                                   |       |          |                                             |
|-----------------------------------|-------|----------|---------------------------------------------|
| Goat anti-Sox10                   | 1:200 | sc-17342 | Santa Cruz (Dallas, TX);<br>RRID:AB_2195374 |
| Goat anti-ChAT                    | 1:100 | AB144P   | Millipore;<br>RRID:AB_2079751               |
| Chicken anti-GFP                  | 1:200 | GFP-1020 | Aves Labs;<br>RRID:AB_10000240              |
| Alexa Fluor goat anti-human 647   | 1:400 | A21445   | Life Technologies;<br>RRID:AB_2535862       |
| AlexaFluor donkey anti-rabbit 488 | 1:400 | A21206   | Life Technologies;<br>RRID:AB_2535792       |
| AlexaFluor donkey anti-rabbit 594 | 1:400 | A21207   | Life Technologies;<br>RRID:AB_141637        |
| AlexaFluor donkey anti-rabbit 647 | 1:400 | A31573   | Life Technologies;<br>RRID:AB_2536183       |
| AlexaFluor donkey anti-rat 488    | 1:400 | A21208   | Life Technologies;<br>RRID:AB_141709        |
| AlexaFluor donkey anti-goat 594   | 1:400 | A11058   | Life Technologies;<br>RRID:AB_2534105       |
| AlexaFluor donkey anti-sheep 594  | 1:400 | A11016   | Life Technologies;<br>RRID:AB_10562537      |

54

55 \* ANNA-1 is a human antibody that we use repeatedly. The concentration of primary  
56 antibody declines with each use, so we do not know the actual antibody concentration  
57 when this antibody is used on each specimen.  
58

59 **Supplementary Table 3: qPCR primers**

| <b><u>Primer name</u></b> | <b><u>Sequence</u></b>      | <b><u>Reference</u></b> |
|---------------------------|-----------------------------|-------------------------|
| <i>Vip</i> Forward        | 5' GCATGCTGATGGAGTTTTCA 3'  | (1)                     |
| <i>Vip</i> Reverse        | 5' GGCATCAGAGTGTCGTTTGA 3'  | (1)                     |
| <i>Penk</i> Forward       | 5' TTCAGCAGATCGGAGGAGTTG 3' | (2)                     |
| <i>Penk</i> Reverse       | 5' AGAAGCGAACGGAGGAGAGAT 3' | (2)                     |
| <i>Gapdh</i> Forward      | 5' AACTTTGGCATTGTGGAAGG 3'  | (3)                     |
| <i>Gapdh</i> Reverse      | 5' GTCTTCTGGGTGGCAGTGAT 3'  | (3)                     |

60  
61  
62  
63

64 **Supplementary video 1:**

65 Video of *Dlx1/2*<sup>-/-</sup> (top) and control (bottom) small intestine at baseline, at 8x speed.  
66 Bowel orientation is proximal (right) and distal (left) for all videos. In control bowel  
67 (bottom), a neurally-mediated contraction complex involving pronounced bowel  
68 straightening and complex propulsive patterns of motility up and down the bowel occurs  
69 from 00:04-00:07. At other times, the control bowel is in a baseline contracted state. In  
70 contrast, the mutant *Dlx1/2*<sup>-/-</sup> bowel is constantly in a baseline contracted state and does  
71 not straighten throughout the video.

72 **Supplementary video 2:**

73 Video of *Dlx1/2*<sup>-/-</sup> (top) and control (bottom) bowel after TTX treatment at 8x speed.  
74 Here, the bowels appear even more contracted and do not undergo neurally-mediated  
75 straightening.

76 **References**

- 77 1. Ngan ES, Shum CK, Poon HC, Sham MH, Garcia-Barcelo MM, Lui VC, and  
78 Tam PK. Prokineticin-1 (Prok-1) works coordinately with glial cell line-derived  
79 neurotrophic factor (GDNF) to mediate proliferation and differentiation of enteric  
80 neural crest cells. *Biochimica et biophysica acta*. 2008;1783(3):467-78.  
81 2. Denning GM, Ackermann LW, Barna TJ, Armstrong JG, Stoll LL, Weintraub  
82 NL, and Dickson EW. Proenkephalin expression and enkephalin release are  
83 widely observed in non-neuronal tissues. *Peptides*. 2008;29(1):83-92.  
84 3. Lopez SH, Avetisyan M, Wright CM, Mesbah K, Kelly RG, Moon AM, and  
85 Heuckeroth RO. Loss of *Tbx3* in murine neural crest reduces enteric glia and  
86 causes cleft palate, but does not influence heart development or bowel transit.  
87 *Developmental biology*. 2018.  
88
